# Supplementary material for: A Systematic Literature Review on the User Experience Design for Game-Based Interventions via 3D Virtual Worlds in K-12 Education
Source: MDPI journal article supplement (doi:10.3390/mti5060028), 2021-05-24
Supplement: s1 [file s1]

Archive with 1 entries (1 files):
- mti-1159823-supplementary.pdf
