# Supplementary material for: A Systematic Literature Review on the User Experience Design for Game-Based Interventions via 3D Virtual Worlds in K-12 Education
Source: MDPI journal article supplement (doi:10.3390/mti5060028), 2021-05-24
Supplement: s1 [file s1 › mti-1159823-supplementary.pdf]

**Supplementary material**  
**Table S1: Primary Education**

| REF                        | Field                                | Platform / Game | Method       | Instruments                                                                                                                                                                               | Evaluation                                                                                                                                                                                                                                    |
|----------------------------|--------------------------------------|-----------------|--------------|-------------------------------------------------------------------------------------------------------------------------------------------------------------------------------------------|-----------------------------------------------------------------------------------------------------------------------------------------------------------------------------------------------------------------------------------------------|
| Barab et al. (2005)        | Science, Mathematics, Social Studies | Quest Atlantis  | Qualitative  | Design-based research, Design Ethnography                                                                                                                                                 | Engage users with lessons from educational research on learning and motivation through experiential learning, inquiry-based learning, and portfolio assessment                                                                                |
| Battal & Tokel (2020)      | Computer Science                     | OpenSim         | Mixed        | Multiple case study research, semi-structured Interviews, two Questionnaires [1]                                                                                                          | Factors affecting satisfaction across different educational programs                                                                                                                                                                          |
| Fokides & Chachlaki (2020) | Environmental Education              | OpenSim         | Quantitative | Quasi-experimental design, Pre-test, two post-tests, delayed post-test, revised Toad Attitude Questionnaire [2], New Ecological Paradigm scale [3], Learning Experience Questionnaire [4] | Examine whether MUVES have a more positive impact on students' knowledge, attitudes toward seals and eco problems, and views regarding the use of MUVES for learning                                                                          |
| Jakoš & Verber (2016)      | Computer Science                     | OpenSim         | Quantitative | Pre-post-tests (isomorphic) validated with Elliott Taw's methodology [5]. Debriefing sessions with Questions from reflection stems [6]                                                    | Impact of student outcomes (achievement of minimal standards of knowledge)<br>Impact of predetermined factors, such as gender, assessment marks in science subjects and the amount of entertainment games play time on participants' outcomes |
| Kamarainen et al. (2015)   | Environmental Education              | EcoMUVE         | Qualitative  | Video and audio Recordings, Student work                                                                                                                                                  | Student engagement in modeling practices that reflect authentic practices in the domain of ecosystems science                                                                                                                                 |
| Kim & Ke (2017)            | Mathematics                          | OpenSim         | Quantitative | Pre-post-tests                                                                                                                                                                            | Mathematical performance                                                                                                                                                                                                                      |
| Lim (2006)                 | Science                              | Quest Atlantis  | Qualitative  | Observation, Interview, Student work, Reflections based on the taxonomy of [7]                                                                                                            | Engagement                                                                                                                                                                                                                                    |

|                           |                                    |                |              |                                                                                                                                   |                                                                                                                                                   |
|---------------------------|------------------------------------|----------------|--------------|-----------------------------------------------------------------------------------------------------------------------------------|---------------------------------------------------------------------------------------------------------------------------------------------------|
| Merchant (2010)           | Language (Literacy)                | Active Worlds  | Qualitative  | Observation, Interview, Field notes, Meeting minutes and documents, Questionnaire                                                 | Implications for curriculum and pedagogy                                                                                                          |
| Mystakidis & Berki (2018) | Language (Literacy)                | Second Life    | Mixed        | Questionnaire, Interviews                                                                                                         | Examination of UW, impact on cognitive, affective and psychomotor aspects of learning                                                             |
| Tüzün (2007)              | Culture; Health, ICT               | Quest Atlantis | Qualitative  | Design-based research, Observation, Interview, Field notes, Student work, Reflections                                             | Examine core issues and challenges when video games are used in the classroom                                                                     |
| Wang et al. (2018)        | Communication                      | iSocial        | Quantitative | Observations coded according to the ESP framework [8]                                                                             | Interaction patterns, verbal and nonverbal, for learning social skills that facilitate the development of sense of embodied social presence (ESP) |
| Yeh & Lan (2018)          | Second Language learning (English) | OpenSim        | Mixed        | Quasi-experimental design, Questionnaire based on Adediwura [9] and Ding and Stapleton [10], Observation, Interview, Student work | Autonomy                                                                                                                                          |

*Table S2: Secondary Education*

| REF                    | Field      | Platform / Game           | Method      | Instruments                                                                                                   | Evaluation                                                                                                                                                                                                                                                                                                                             |
|------------------------|------------|---------------------------|-------------|---------------------------------------------------------------------------------------------------------------|----------------------------------------------------------------------------------------------------------------------------------------------------------------------------------------------------------------------------------------------------------------------------------------------------------------------------------------|
| Barab et al. (2012)    | Language   | Plague: Modern Prometheus | Mixed       | Pre-post-tests, Interview and Observation                                                                     | Learning gain and engagement                                                                                                                                                                                                                                                                                                           |
| Dede et al. (2017)     | Humanities | EcoXPT                    | Qualitative | Interview                                                                                                     | Engagement                                                                                                                                                                                                                                                                                                                             |
| Grotzer et al. (2013)  | Science    | EcoMUVE                   | Mixed       | Pre-post-tests, and Interview with teachers                                                                   | Learning with event-based explanations as they did explanations focused on patterns                                                                                                                                                                                                                                                    |
| Jacobson et al. (2015) | Science    | EcoMUVE                   | Mixed       | Pre-post-tests, and Interview using adapted from validated and reliable items from Burns, Okey, and Wise [11] | Learning computational scientific inquiry (CSI) as an innovative model for learning important scientific knowledge and new practices for “doing” science. To assess learning outcomes using multiple-choice questions about science inquiry (items Q1–Q12) adapted from validated and reliable items from Burns, Okey, and Wise (1985) |

|                             |                  |                        |              |                                                                                                                               |                                                                                                                                                                                                                                                                                                                 |
|-----------------------------|------------------|------------------------|--------------|-------------------------------------------------------------------------------------------------------------------------------|-----------------------------------------------------------------------------------------------------------------------------------------------------------------------------------------------------------------------------------------------------------------------------------------------------------------|
| Ketelhut (2006)             | Science          | River City             | Quantitative | Self-efficacy using the SETS instrument [12] and Control Predictors [13]                                                      | How differences in self-efficacy can affect students' participation in scientific inquiry                                                                                                                                                                                                                       |
| Loula et al. (2014)         | Science          | Caatinga biome         | Qualitative  | Interview and observations                                                                                                    | Students' understanding of thermal regulation in ectothermic animals                                                                                                                                                                                                                                            |
| Metcalf et al. (2018)       | Science          | EcoMUVE                | Quantitative | Post-test of students learning outcomes (concept mapping)                                                                     | The use of EcoMUVE to support the construction of concept maps representing causal relationships in a dynamic system                                                                                                                                                                                            |
| Moon et al. (2020)          | Science          | OpenSim                | Quantitative | Classifiers Attention-switching Multimodal representation Pattern development Pattern contextualization                       | To maintain learners' cognitive and affective engagement in a highly interactive digital learning environment                                                                                                                                                                                                   |
| Nelson et al. (2007)        | Science          | River City             | Quantitative | Test score gains of control based on students' learning outcomes                                                              | Investigation on (a) how students who viewed greater numbers of guidance messages performed on content tests compared to those who viewed less, and (b) whether boys and girls accessed the guidance to the same degree, and whether there was an interaction between gender and guidance use on content scores |
| Pellas (2014)               | Computer Science | OpenSim+Scratch4SL     | Quantitative | Students' engagement [14]                                                                                                     | Positive or negative impact on student engagement (cognitive, social emotional)                                                                                                                                                                                                                                 |
| Pellas & Persoutseas (2016) | Computer Science | Second Life+Scratch4SL | Quantitative | Students' engagement Fredricks et al. [15] and Appleton et al. [16] and user experience                                       | The impact of Second Life+Scratch4SL on students' engagement and experience                                                                                                                                                                                                                                     |
| Pellas (2017)               | Computer Science | OpenSim+Scratch4SL     | Quantitative | Correlations of Community of Inquiry (CoI) presence indicators (social, cognitive, teaching) <a href="#">Swan et al. [17]</a> | The contribution of CoI model presence indicators as theoretical principles for analyzing students' interactions in a 3D game-like environment becomes to this notion as crucial parameters for and instructional process                                                                                       |
| Pellas & Vosinakis (2018)   | Computer Science | OpenSim+Scratch4SL     | Mixed        | A closed-ended pre-questionnaire was adopted by Lahtinen et al. [18]                                                          | The effect of simulation games developed in Scratch and OpenSim on students' learning performance by assessing computational problem-solving strategies                                                                                                                                                         |

|                     |                           |                |              |                                                                                                                                                                      |                                                                                                                                                                                                         |
|---------------------|---------------------------|----------------|--------------|----------------------------------------------------------------------------------------------------------------------------------------------------------------------|---------------------------------------------------------------------------------------------------------------------------------------------------------------------------------------------------------|
|                     |                           |                |              | A closed-ended (pre-and-post-questionnaire)<br>Computational Thinking Scales (CTS) questionnaire based on Korkmaz et al. [19]<br>A think-aloud protocol<br>Interview |                                                                                                                                                                                                         |
| Rico et al. (2011)  | Computer Science          | OpenSim        | Quantitative | Correlation between knowledge degree of VWs and programming skills for a typical group of high school students                                                       | Students' educational experience and programming skills                                                                                                                                                 |
| Şimşek (2017)       | Maths                     | Second Life    | Quantitative | Students' pre-experiment and post-experiment scores, taken from Mathematics Attitude Scale (Ministry of turkey Education)                                            | Second Life environment has an important effect on students' attitude towards mathematics                                                                                                               |
| Twining             | Science                   | Second Life    | Qualitative  | Observations and interviews                                                                                                                                          | The Schome Park Programme (SPP), which was established with the specific aim of extending our thinking about schome inside Second Life to provide opportunities offered by 3D virtual worlds            |
| Young et al. (2012) | STEM                      | Second Life    | Quantitative | Pre-post-tests                                                                                                                                                       | To assess the educational gains made by the students when they can play Second Life-supported games for STEAM subjects                                                                                  |
| Zheng et al. (2009) | English Language learning | Quest Atlantis | Qualitative  | Negotiation for Action Codes using CMDA and ethnographies [20,21]                                                                                                    | To explain how interaction within avatar-embodied collaboration contexts between native English speakers and non-native English speakers can be provided as resources for English language acquisition. |

## References

1. Chou, S.; Liu, C. Learning Effectiveness in Web-Based Technology-Mediated Virtual Learning Environment. Proceedings of the 38th Annual Hawaii International Conference on System Sciences. 6 January 2005. Big Island, HI, US. <https://doi.org/10.1109/HICSS.2005.385>
2. Tomažič, I. Reported experiences enhance favourable attitudes toward toads. *Eurasia J. of Math. Sci. & Tech. Ed.* **2011**, *7*(4), 253–262.

3. Dunlap, R.; Van Liere, D.; Mertig, G.; Jones, R. New trends in measuring environmental attitudes: measuring endorsement of the new ecological paradigm: a revised NEP scale. *J. Soc. Iss.* **2000**, *56* (3), 425–442.
4. Fokides, E.; Kaimara, P.; Deliyannis, I.; Atsikpasi, P. Development of a scale for measuring the learning experience in serious games. Preliminary results. In Proc. of the digital culture & audiovisual challenges international conference. Corfu, Greece: Ionian University. 10–11 May 2019. pp. 1-2
5. Elliott Tew, A. Assessing fundamental introductory computing concept knowledge in a language independent manner. Ph.D. Thesis. School of Interactive Computing Georgia Institute of Technology, Georgia, US, December 2010
6. Discover Sensors. Discover sensors. Retrieved from [http://www.discoversensors.ie/junior\\_certificate/%20reflection\\_stems1](http://www.discoversensors.ie/junior_certificate/%20reflection_stems1), 2016
7. Bangert-Drowns, R.; Pyke, C. A Taxonomy of Student Engagement with Educational Software: An Exploration of Literate Thinking with Electronic Text. *J. Educ. Comput. Res.*, **2016**, *24* (3), 213–234.
8. Mennecke, B.; Triplett, J.; Hassall, M.; Conde, J.; Heer, R. An examination of a theory of embodied social presence in virtual worlds. *Dec. Scienc.* **2016**, *42*, 413–450.
9. Adediwura, A. Effect of peer and self-assessment on male and female students' self-efficacy and self-autonomy in the learning of mathematics. *Gen. Behav.* **2012**, *10*(1), 4492–4508.
10. Ding, F.; Stapleton, P. Walking like a toddler: Students' autonomy development in English during cross-border transitions. *Syst.* **2016**, *59*, 12–28.
11. Burns, J.; Okey, J.; Wise, K. Development of an integrated process skill test: TIPS II. *Journal of Research in Science Teaching*, Wiley, New Jersey, US. **1985**, *22*, 169–177.
12. Ketelhut, D. Assessing science self-efficacy in a virtual environment: A measurement pilot. Harvard University, Cambridge, MA, December **2004**.
13. Lawless, A.; Kulikowich, M. Understanding hypertext navigation through cluster analysis. *J. Educ. Comput. Res.* **1996**, *14*(4), 385–399.
14. Kong, Q.; Wong, N.; Lam, C. Student engagement in mathematics: Development of instrument and validation of a construct. *Math. Educ. Res. J.* **2003**, *54*, 4–21.
15. Fredricks, J. A.; Blumenfeld, P. C.; Paris, A. H. School engagement: Potential of the concept, state of the evidence. *Review of Educational Research.* **2004**, *74*(1), 59–109.
16. Appleton, J.; Christenson, S.; Kim, D.; Reschly, A. L. Measuring cognitive and psychological engagement: Validation of the student engagement instrument. *J. Sch. Psychol.*, Elsevier, Amsterdam, Netherlands: **2006**, *44*(5), 427–445.
17. Swan, K.; Richardson, J.; Ice, P.; Garrison, R.; Cleveland-Innes, M.; Arbaugh, B. Validating a measurement tool of presence in online communities of inquiry. *E-Ment.* **2008**, *2* (24), 1–12.
18. Lahtinen, E.; Ala-Mutka, K.; Järvinen, H. A study of the difficulties of novice programmers. In: Proceedings of the 10th Annual SIGCSE Conference on innovation and Technology in Computer Science Education, Caparica, Portugal, 27-29 June 2005.
19. Korkmaz, Ö. Çakir, R.; Özden, M. A validity and reliability study of the Computational Thinking Scales (CTS). *Comput. Hum. Behav.* **2017**, *72*, 558-569. DOI: <http://dx.doi.org/10.1016/j.chb.2017.01.005>.
20. Chapelle, C. *English language learning and technology: Lectures on applied linguistics in the age of information and communication technology*. John Benjamins: Philadelphia, US. 2003; Volume 7, 1-211
21. Herring, C. Computer-mediated discourse analysis: An approach to researching online behavior. In J. H. Gray (Ed.), *Designing for virtual communities in the service of learning*. Cambridge University Press, Cambridge, UK. **2004**, pp. 338–376
